# Supplementary material for: The HSP90 inhibitor Onalespib exerts synergistic anti-cancer effects when combined with radiotherapy: an in vitro and in vivo approach
Source: PubMed Central journal article supplement (PMC7125222; doi:10.1038/s41598-020-62293-4), 2020-04-03

## Supplementary information

The HSP90 inhibitor Onalespib exerts synergistic anti-cancer effects when combined with radiotherapy: an in vitro and in vivo approach

Diana Spiegelberg, Andris Abramenkovs, Anja Charlotte Lundgren Mortensen, Sara Lundsten, Marika Nestor, Bo Stenerlöv

Supplementary information

Western blot membranes

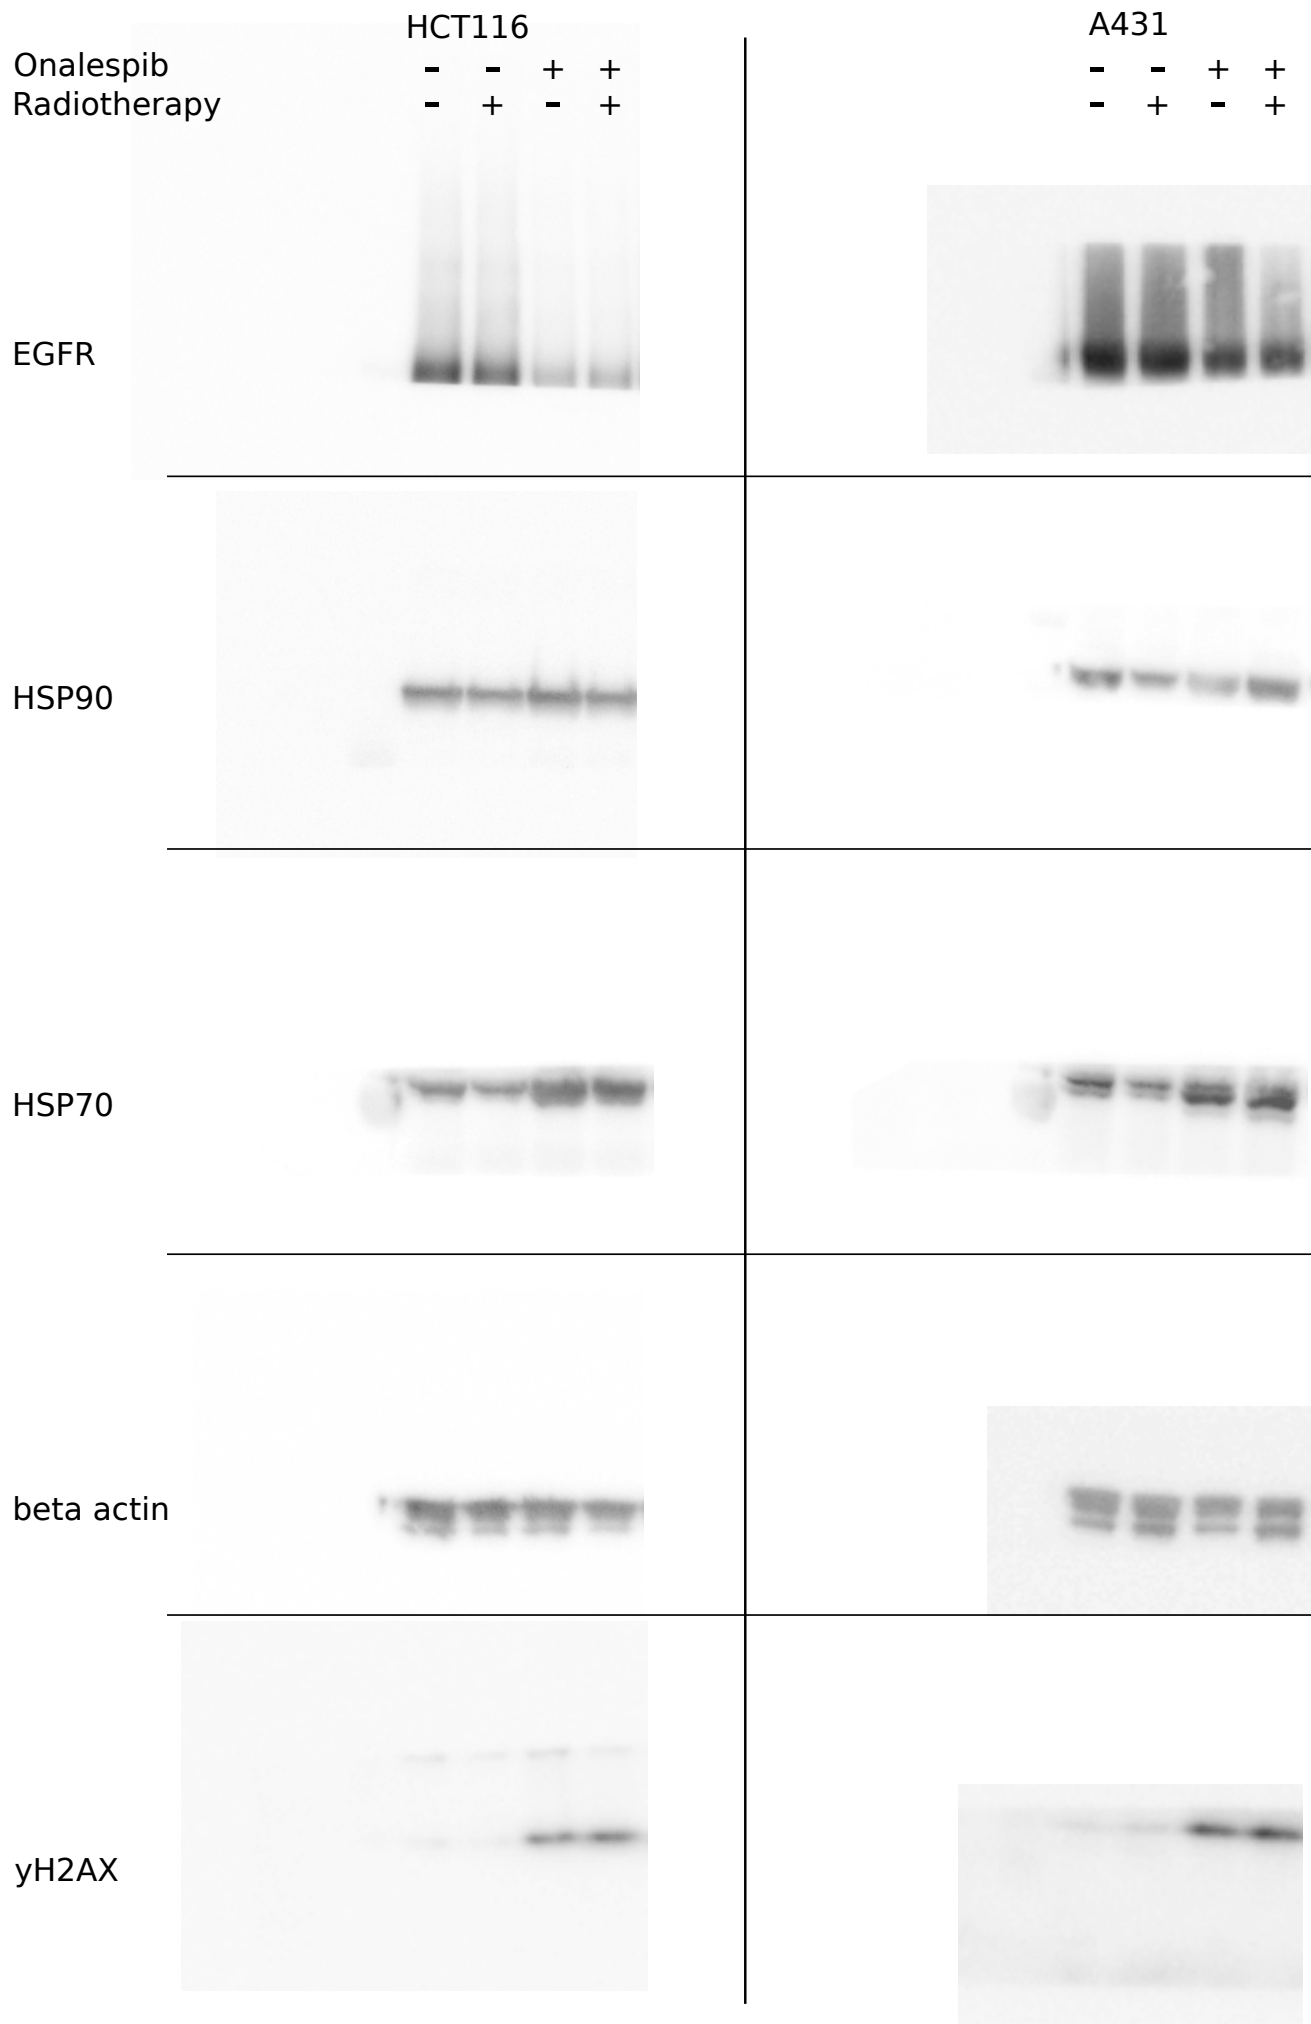

Supplement: 41598_2020_62293_MOESM2_ESM.pdf [file 41598_2020_62293_MOESM2_ESM.pdf]
